# Supplementary material for: An integrated microfluidic platform for on-site qPCR analysis: food allergen detection from sample to result
Source: Royal Society of Chemistry journal article supplement (doi:10.1039/d4lc00570h), 2024-10-04
Supplement: d4lc00570h1.pdf [file d4lc00570h1.pdf]

## Integrated microfluidic platform for on-site qPCR analysis: food allergen detection from sample to result

Anne-Gaëlle Bourdat,<sup>\*a</sup> Remco den Dulk,<sup>a</sup> Bastien Serrano,<sup>a</sup> François Boizot,<sup>a</sup> Gervais Clarebout,<sup>a</sup> Xavier Mermet,<sup>a</sup> Raymond Charles,<sup>a</sup> Jean Porcherot,<sup>a</sup> Armelle Keiser,<sup>a</sup> Manuel Alessio,<sup>a</sup> Patricia Laurent,<sup>a</sup> Nicolas Sarrut<sup>a</sup> and Myriam Cubizolles<sup>a</sup>

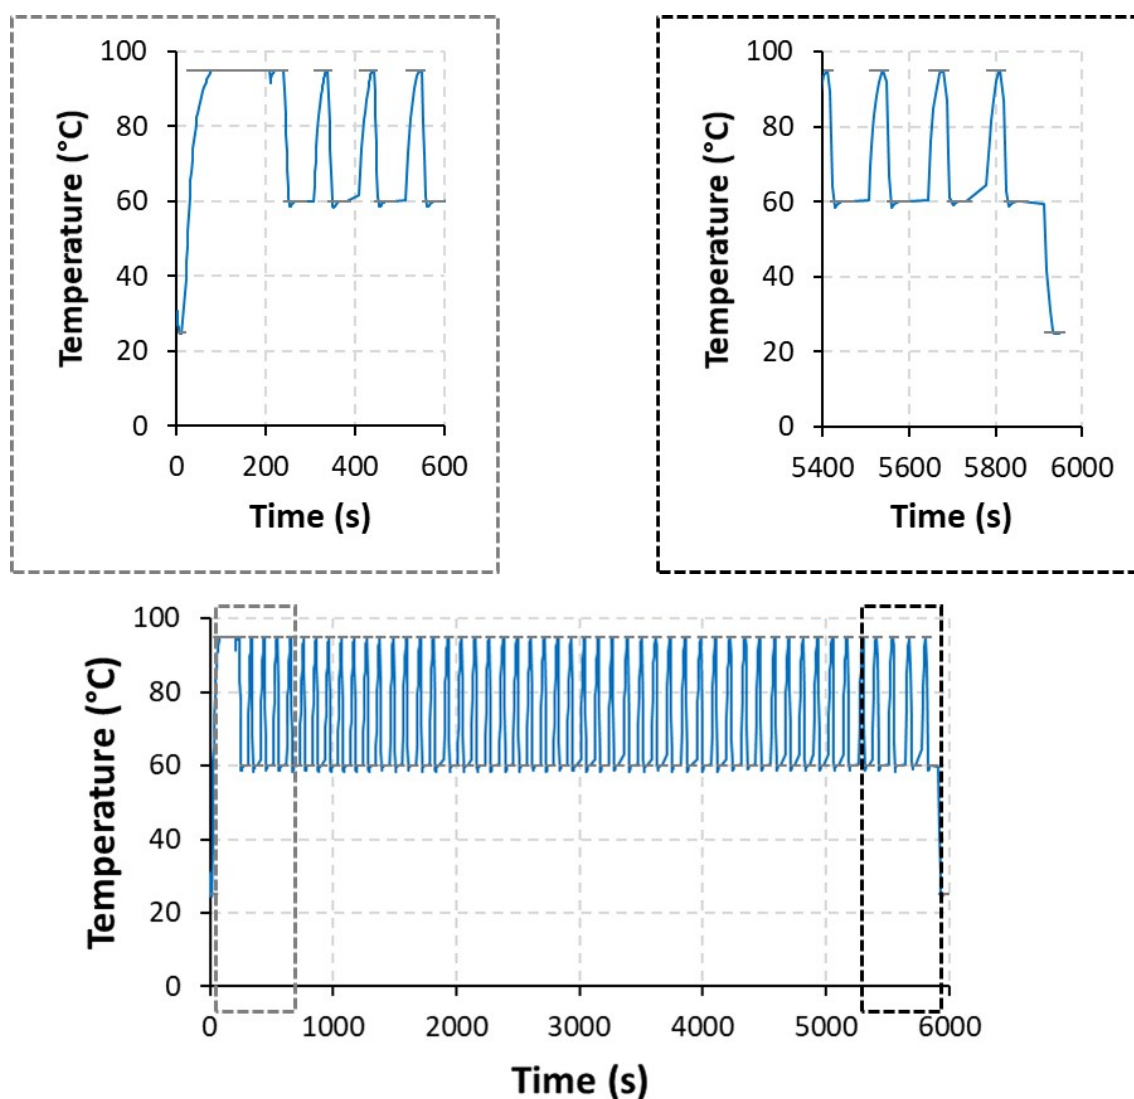

Figure S1 : Thermal profile given by the system. The measurement was done during 100 minutes. Grey line corresponds to temperature instructions given to the Peltier and the blue line represents the temperature reported by the Pt1000. PID control is set to avoid overshoots. The few degrees of undershoot have no consequence on the PCR efficiency.
